# Supplementary material for: Adjustable ultraviolet and white light dual emission phosphor Y2Sr(Ga1−yAly)4SiO12:xPr3+ for health lighting
Source: Royal Society of Chemistry journal article supplement (doi:10.1039/d3cp05462d), 2024-01-01
Supplement: d3cp05462d1.pdf [file d3cp05462d1.pdf]

## Supporting Information

### **Adjustable ultraviolet and white light dual emission phosphor $\text{Y}_2\text{Sr}(\text{Ga}_{1-y}\text{Al}_y)_4\text{SiO}_{12}:\text{xPr}^{3+}$ for health lighting**

Qihui Yu<sup>1</sup>, Huan Zheng<sup>1</sup>, Jiajun He<sup>1</sup>, Xu Yang<sup>1</sup>, Yingnan Guo<sup>1\*</sup>, Li Guan<sup>1,2</sup>, Xu Li<sup>1\*</sup>, Fenghe Wang<sup>1\*</sup>

<sup>1</sup> College of Physics Science and Technology, Hebei University, Baoding 071002, PR China

<sup>2</sup> Key Laboratory of High-Precision Computation and Application of Quantum Field Theory of Hebei Province, Hebei University, Baoding 071002, PR, China

**Table S1.** The fitting index information of  $\text{Y}_2\text{SrGa}_4\text{SiO}_{12}:1\%\text{Pr}^{3+}$ 

|               |                  |                         |                                          |
|---------------|------------------|-------------------------|------------------------------------------|
| Fitting index | Chemical formula |                         | $\text{Y}_2\text{SrGa}_4\text{SiO}_{12}$ |
|               | Phase content    |                         | 100                                      |
| Rwp= 9.64%    | Card ID          |                         | PDF#00-043-0512                          |
|               | Space group      |                         | I a -3 d                                 |
| Rp= 7.04%     | Cell parameter   | a (Å)                   | 12.28376(40)                             |
|               |                  | b(Å)                    | 12.28376(40)                             |
| GOF=1.61      |                  | c(Å)                    | 12.28376(40)                             |
|               |                  | $\alpha(^{\circ})$      | 90                                       |
| X2=GOF^2      |                  | $\beta(^{\circ})$       | 90                                       |
|               |                  | $\gamma(^{\circ})$      | 90                                       |
|               |                  | Volume(Å <sup>3</sup> ) | 1853.51(18)                              |

**Table S2.** The refined XRD Atomic parameters of  $\text{Y}_2\text{SrGa}_4\text{SiO}_{12}:1\%\text{Pr}^{3+}$ 

| Atomic parameters |      |      |       |           |           |           |
|-------------------|------|------|-------|-----------|-----------|-----------|
| Atom              | Wyck | Site | S.O.F | x/a       | y/b       | z/c       |
| Y                 | 24c  | 2.22 | 0.617 | 1/8       | 0         | 1/4       |
| Sr                | 24c  | 2.22 | 0.333 | 1/8       | 0         | 1/4       |
| Ga                | 16a  | -3   |       | 0         | 0         | 0         |
| Ga1               | 24d  | -4   | 0.667 | 3/8       | 0         | 1/4       |
| Si                | 24d  | -4   | 0.333 | 3/8       | 0         | 1/4       |
| O                 | 96h  | 1    |       | 0.304(51) | 0.494(60) | 0.656(92) |
| Pr                | 24c  | 2.22 | 0.05  | 1/8       | 0         | 1/4       |

**Table S3.** The crystal structure data and refinement parameters for samples

| Formula             | X=0      | X=0.4%   | X=0.6%   | X=1%     | X=1.5%   |
|---------------------|----------|----------|----------|----------|----------|
| Crystal system      | Cubic    | Cubic    | Cubic    | Cubic    | Cubic    |
| Space group         | Ia-3d    | Ia-3d    | Ia-3d    | Ia-3d    | Ia-3d    |
| a (Å)               | 12.28263 | 12.28376 | 12.28395 | 12.28455 | 12.28479 |
| V (Å <sup>3</sup> ) | 1852.99  | 1853.51  | 1853.59  | 1853.86  | 1853.97  |
| $\chi^2$ (%)        | 2.63     | 2.59     | 3.29     | 2.70     | 2.77     |
| $R_{wp}$ (%)        | 9.70     | 9.46     | 12.01    | 9.88     | 10.10    |
| $R_p$ (%)           | 7.14     | 7.04     | 8.94     | 7.35     | 7.52     |

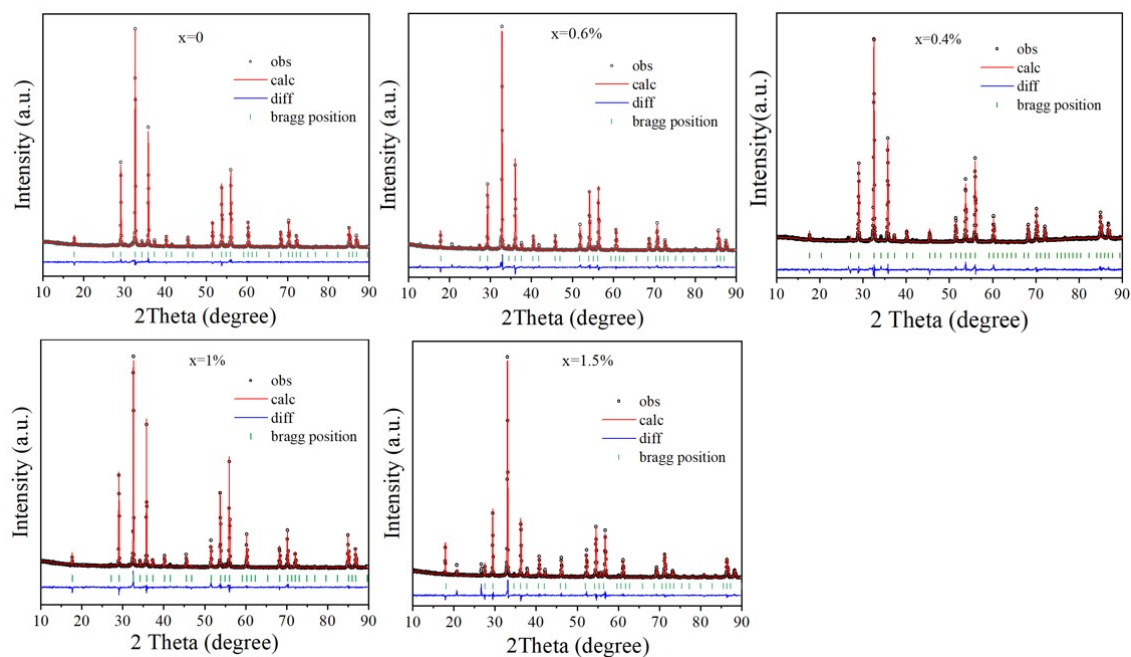**Fig S1.** Rietveld refinement and crystal structure of YSGS:xPr<sup>3+</sup> (x = 0–1.5%).

**Table S4.** The ICP-OES test results of sample Y<sub>2</sub>SG<sub>4</sub>S: 1%Pr

| $m_0$ (g) | $V_0$ (ml) | element | $C_0$ (mg/L) | f  | $C_1$ (mg/L) | $C_x$ (mg/kg) | W (%)    |
|-----------|------------|---------|--------------|----|--------------|---------------|----------|
| 0.1151    | 100        | Sr      | 12.1001      | 10 | 121.001      | 105126.8462   | 10.5127% |
| 0.1151    | 100        | Ga      | 49.2893      | 10 | 492.893      | 428230.2346   | 42.8230% |
| 0.1151    | 100        | Pr      | 0.3804       | 10 | 3.804        | 3304.9522     | 0.3305%  |
| 0.1151    | 100        | Y       | 23.8519      | 10 | 238.519      | 207227.6281   | 20.7228% |

$$C_x(\text{mg/kg}) = \frac{C_0(\text{mg/L}) * f * V_0(\text{mL}) * 10^{-3}}{m_0(\text{g}) * 10^{-3}} = \frac{C_1(\text{mg/L}) * V_0(\text{mL}) * 10^{-3}}{m_0(\text{g}) * 10^{-3}}$$

$$W(\%) = \frac{C_x(\text{mg/kg})}{10^6} * 100\%$$

In the above formula,  $m_0$  is the mass of the sample,  $V_0$  is the volume of the constant volume of the sample after digestion,  $f$  is the dilution multiple,  $C_0$  is the concentration of elements in the test solution,  $C_1$  is the concentration of elements in the stock solution of the sample digestion solution,  $C_x$  is the test result of the measured element, and  $W$  is the final test result of the measured element.

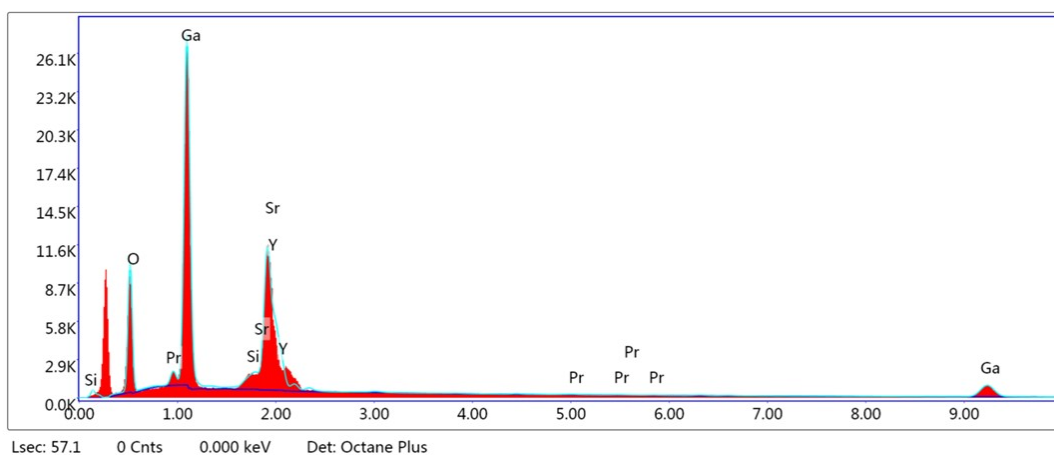

| Element | Weight % | Atomic % | Net Int. | Error % | Kratio | Z      | A      | F      |
|---------|----------|----------|----------|---------|--------|--------|--------|--------|
| O K     | 13.71    | 41.76    | 920.20   | 6.13    | 0.0638 | 0.8240 | 0.5643 | 1.0000 |
| GaL     | 42.89    | 29.19    | 2632.40  | 3.30    | 0.3501 | 0.5829 | 1.1775 | 0.9999 |
| SiK     | 2.88     | 5.56     | 301.60   | 8.76    | 0.0049 | 0.7390 | 0.8096 | 1.0037 |
| SrL     | 13.81    | 8.92     | 599.21   | 4.83    | 0.0150 | 0.5565 | 0.9607 | 1.0005 |
| Y L     | 26.26    | 14.41    | 1142.90  | 2.07    | 0.1699 | 0.5621 | 0.9689 | 0.9999 |
| PrL     | 0.45     | 0.16     | 6.80     | 55.36   | 0.0026 | 0.5559 | 1.0400 | 1.0166 |

**Fig. S2.** The EDS spectrum of YSGS:1%Pr<sup>3+</sup> phosphor. The quantitative data of each element.

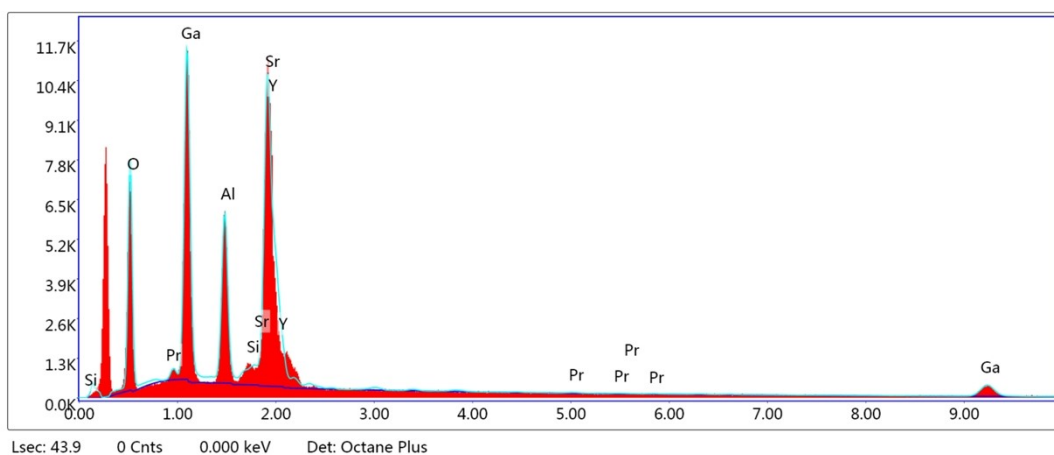

| Element | Weight % | Atomic % | Net Int. | Error % | Kratio | Z      | A      | F      |
|---------|----------|----------|----------|---------|--------|--------|--------|--------|
| O K     | 10.08    | 30.84    | 941.80   | 6.55    | 0.0703 | 0.8106 | 0.5364 | 1.0000 |
| GaL     | 26.44    | 18.52    | 1266.10  | 3.57    | 0.2014 | 0.5751 | 1.1813 | 1.0001 |
| AlK     | 8.19     | 16.23    | 989.70   | 4.23    | 0.0541 | 0.7124 | 0.8027 | 1.0029 |
| SiK     | 3.29     | 5.38     | 207.40   | 21.90   | 0.0022 | 0.7300 | 0.8437 | 1.0049 |
| SrL     | 16.20    | 10.01    | 882.20   | 7.73    | 0.0089 | 0.5499 | 0.9976 | 1.0009 |
| YL      | 35.32    | 18.86    | 1354.84  | 1.86    | 0.2357 | 0.5554 | 1.0027 | 0.9998 |
| PrL     | 0.48     | 0.15     | 6.60     | 56.75   | 0.0028 | 0.5472 | 1.0389 | 1.0094 |

**Fig. S3.** The EDS spectrum of  $\text{YSr}_{2.4}\text{Al}_{1.6}\text{S}:\text{1}\%\text{Pr}^{3+}$  phosphor. The quantitative data of each element.

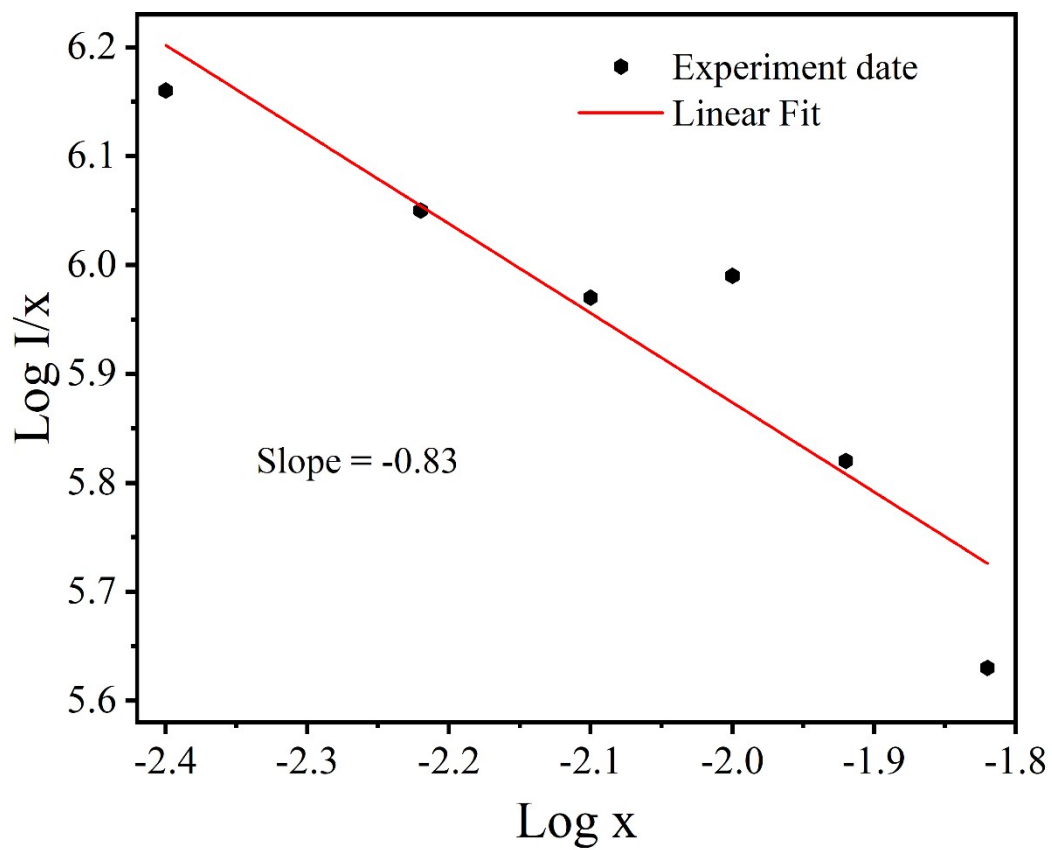

Fig. S4. the  $\lg(I/x) - \lg(x)$  plot and linear fitting

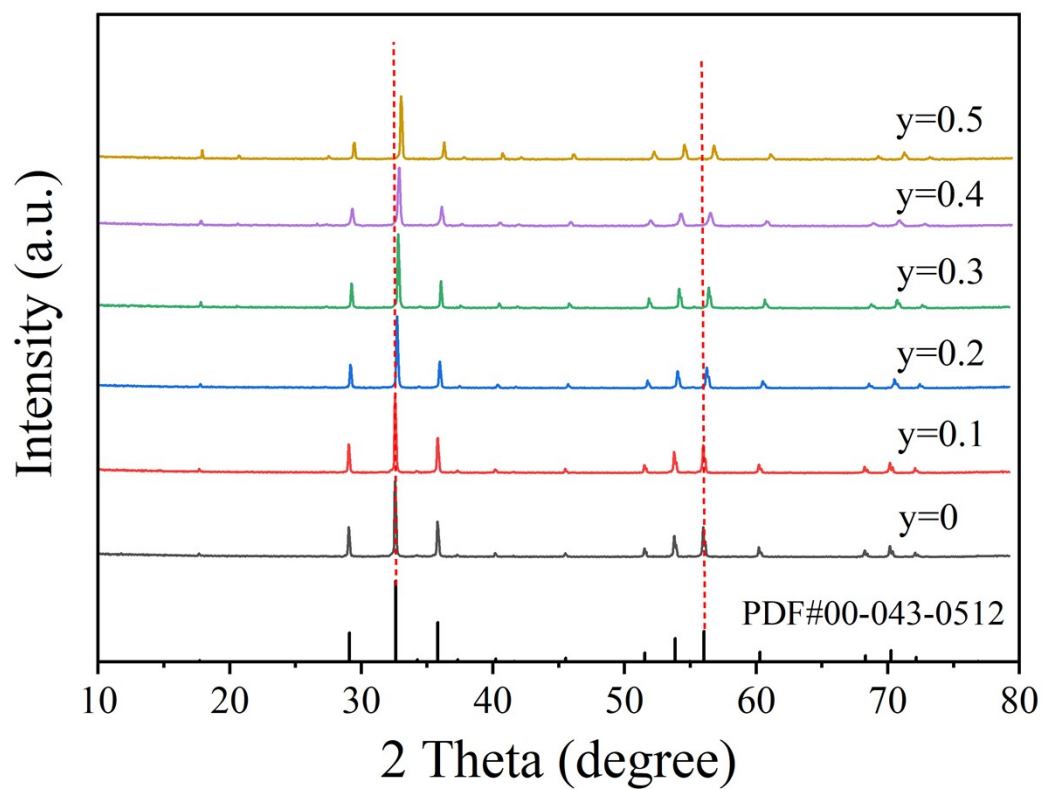

**Fig. S5.** XRD patterns of  $Y_2Sr(Ga_{1-y}Al_y)_4SiO_{12}:0.01Pr^{3+}$  ( $y=0-0.5$ ), bars at button present the standard data of  $Y_3Ga_5O_{12}$  (PDF 00-043-0512).



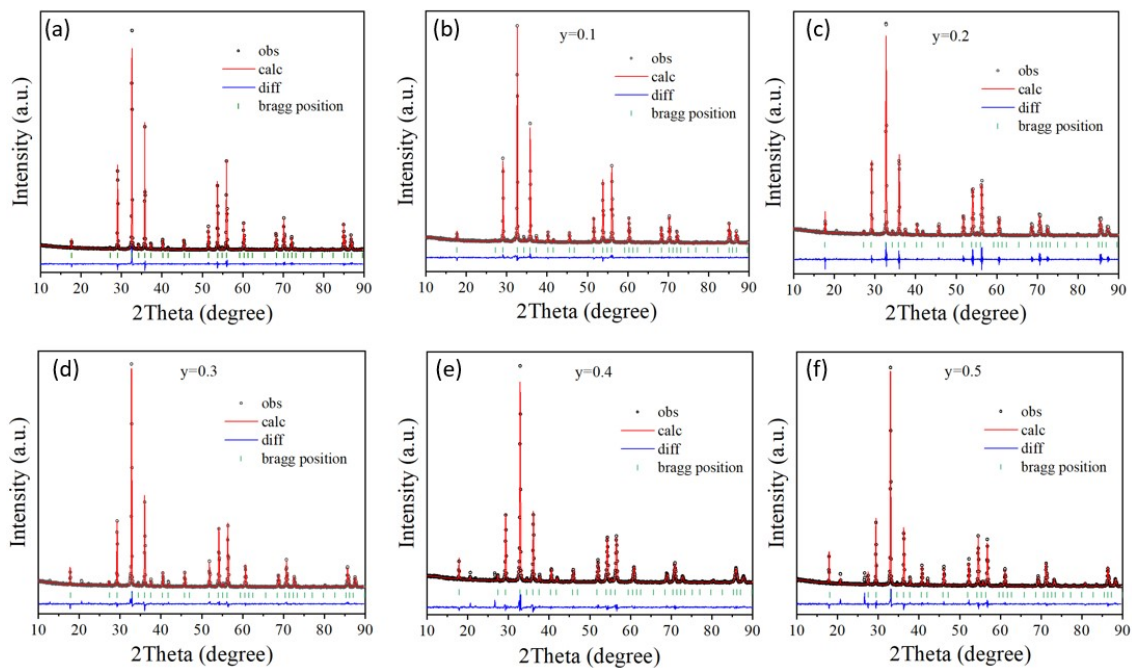

**Fig. S6.** Rietveld refinement and crystal structure of  $\text{YSG}_{1-y}\text{A}_y\text{S}:1\%\text{Pr}^{3+}$  ( $y = 0-0.5$ ).

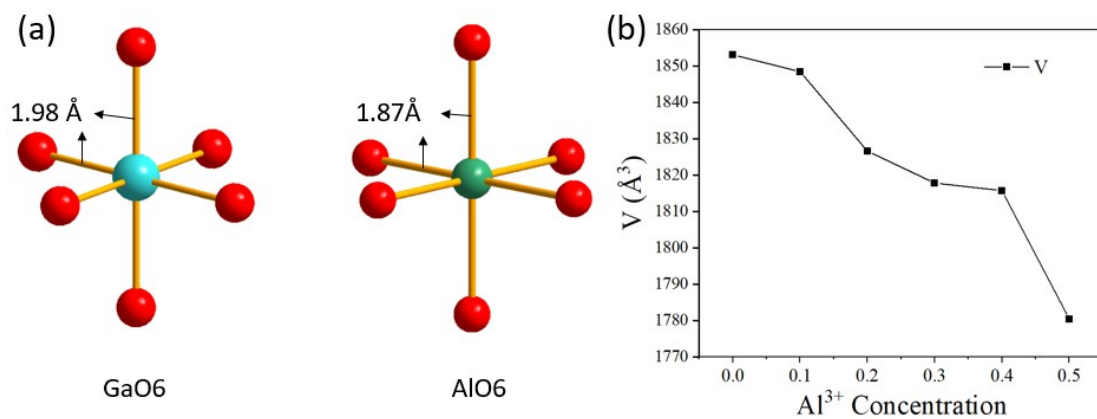

**Fig. S7.** (a) The average bond length of Ga-O and Al-O. (b) The change trend of the unit cell volume.

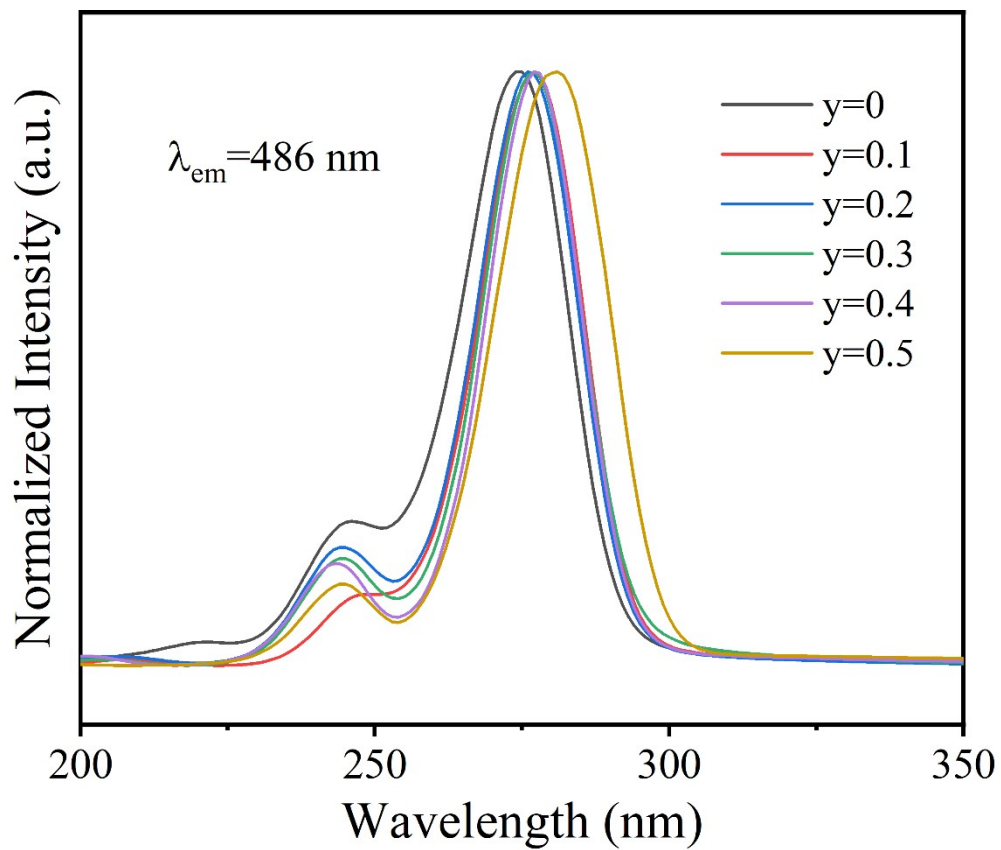

**Fig. S8.** Normalized excitation spectra of  $\text{Y}_2\text{Sr}(\text{Ga}_{1-y}\text{Al}_y)_4\text{SiO}_{12}:0.01\text{Pr}^{3+}$  ( $y=0.0, 0.1, 0.2, 0.3, 0.4, 0.5$ ) monitored at 486 nm

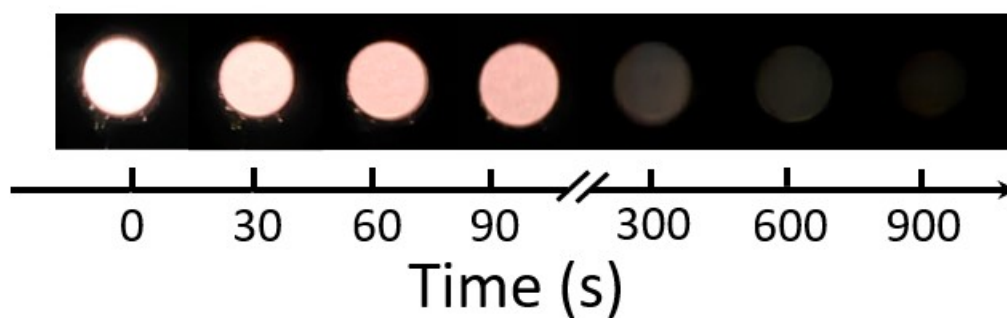

**Fig. S9.** Continuous luminescence of the sample under 275 nm excitation for 10 minutes.

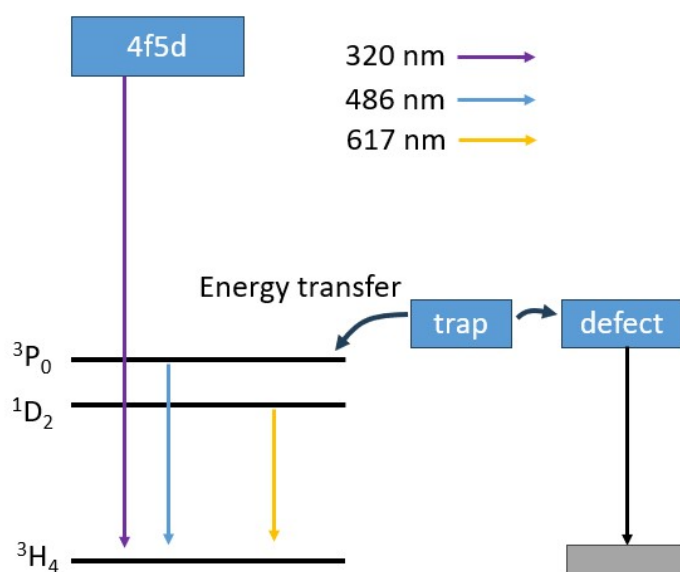

**Fig. S10.** Energy transfer diagram of trap energy level
